# Supplementary material for: Occurrence, Distribution, and Management of Aphid-Transmitted Viruses in Cucurbits in Spain
Source: MDPI journal article supplement (doi:10.3390/pathogens12030422), 2023-03-07
Supplement: s1 [file s1]

**Table S1.** Besides the viral species that can lead to mixed infections in plants, which have been reviewed in Moreno and López-Moya, 2020 [1], the following list covers further mixed infections between those particular aphid-borne viruses that have been described in this review and other viral species found in the literature.

| APHID-BORNE<br>VIRUSES | MIXED INFECTIONS                                | CITATION |
|------------------------|-------------------------------------------------|----------|
| CABYV                  | Beet pseudoyellows virus (BPYV)                 | [2]      |
|                        | Cowpea aphid-borne mosaic virus (CABMV)         | [3]      |
|                        | Cucumber green mottle mosaic virus (CGMMV)      | [4]      |
|                        | Cucumber leaf spot virus (CLSV)                 | [5]      |
|                        | Cucumber mosaic virus (CMV)                     | [6]      |
|                        | Cucurbit chlorotic yellow virus (CCYV)          | [6]      |
|                        | Cucumber vein yellowing virus (CVYV)            | [2]      |
|                        | Cucurbit yellow stunting disorder virus (CYSDV) | [2]      |
|                        | Melon aphid-borne yellows virus (MABYV)         | [7]      |
|                        | Melon necrotic spot virus (MNSV)                | [2]      |
|                        | Moroccan watermelon mosaic virus (MWMV)         | [8]      |
|                        | Papaya ringsplot virus (PRSV)                   | [2]      |
|                        | Suakwa aphid-borne yellows virus (SABYV)        | [9]      |
|                        | Tobacco mosaic virus (TMV)                      | [10]     |
|                        | Watermelon mosaic virus (WMV)                   | [2]      |
|                        | Zucchini yellow mosaic virus (ZYMV)             | [6]      |
| CMV                    | Alfalfa mosaic virus (AMV)                      | [11]     |
|                        | Broad bean wilt virus 2 (BBWV2)                 | [12]     |
|                        | Bean common mosaic virus (BCMV)                 | [6]      |
|                        | Bean yellow mosaic virus (BYMV)                 | [13]     |
|                        | Cucurbit aphid-borne yellows virus (CABYV)      | [6]      |
|                        | Canna yellow mottle virus (CaYMV)               | [13]     |
|                        | Cucumber green mottle mosaic virus (CGMMV)      | [4]      |
|                        | Cowpea mottle virus (CMeV)                      | [14]     |
|                        | Cowpea mild mottle virus (CPMMV)                | [15]     |
|                        | Cowpea mottle virus (CPMoV)                     | [15]     |
|                        | Cucurbit chlorotic yellow virus (CCYV)          | [6]      |
|                        | Cucumber vein yellowing virus (CVYV)            | [2]      |
|                        | Melon necrotic spot virus (MNSV)                | [2]      |
|                        | Pepino mosaic virus (PepMV)                     | [16]     |
|                        | Pepper mottle virus (PepMoV)                    | [17]     |
|                        | Papaya ringsplot virus (PRSV)                   | [18]     |
|                        | Pepper veinal mottle virus (PVMV)               | [19]     |
|                        | Potato virus Y (PVY)                            | [11]     |
|                        | Southern bean mosaic virus (SBMV)               | [15]     |
|                        | Southern tomato virus (STV)                     | [16]     |
|                        | Tobacco mosaic virus (TMV)                      | [11]     |
|                        | Tomato mosaic virus (ToMV)                      | [11]     |
|                        | Tomato torrado virus (ToTV)                     | [20]     |
|                        | Tomato spotted wilt virus (TSWV)                | [11]     |

|      |                                                 |      |
|------|-------------------------------------------------|------|
|      | Tomato yellow ring virus (TYRV)                 | [5]  |
|      | Turnip mosaic virus (TuMV)                      | [21] |
|      | Watermelon mosaic virus (WMV)                   | [18] |
|      | Zucchini yellow mosaic virus (ZYMV)             | [6]  |
| PRSV | Cucurbit aphid-borne yellows virus (CABYV)      | [2]  |
|      | Cucumber mosaic virus (CMV)                     | [2]  |
|      | Cucumber vein yellowing virus (CVYV)            | [2]  |
|      | Lettuce chlorosis virus (LCV)                   | [22] |
|      | Melon necrotic spot virus (MNSV)                | [2]  |
|      | Papaya mosaic virus (PapMV)                     | [23] |
|      | Papaya leaf distortion mosaic virus (PLDMV)     | [24] |
|      | Squash mosaic virus (SqMV)                      | [25] |
|      | Tobacco mosaic virus (TMV)                      | [10] |
|      | Tomato yellow leaf curl virus-IL (TYLCV)        | [22] |
|      | Watermelon mosaic virus (WMV)                   | [26] |
|      | Zucchini yellow mosaic virus (ZYMV)             | [26] |
| WMV  | Beet yellows virus (BYV)                        | [4]  |
|      | Cucurbit aphid-borne yellows virus (CABYV)      | [2]  |
|      | Cucumber green mottle mosaic virus (CGMMV)      | [4]  |
|      | Cucumber mosaic virus (CMV)                     | [18] |
|      | Cucumber vein yellowing virus (CVYV)            | [2]  |
|      | Cucurbit yellow stunting disorder virus (CYSDV) | [27] |
|      | Melon necrotic spot virus (MNSV)                | [2]  |
|      | Moroccan watermelon mosaic virus (MWMV)         | [28] |
|      | Papaya ringsplot virus (PRSV)                   | [26] |
|      | Squash mosaic virus (SqMV)                      | [25] |
|      | Tomato ringspot virus (ToRSV)                   | [29] |
|      | Zucchini yellow mosaic virus (ZYMV)             | [26] |
| MWMV | Cucurbit aphid-borne yellows virus (CABYV)      | [8]  |
|      | Cowpea mild mottle virus (CpMMV)                | [30] |
|      | Cucumber vein-clearing virus (CuVCV)            | [30] |
|      | Papaya virus A (PaVA)                           | [31] |
|      | Papaya ringsplot virus (PRSV)                   | [32] |
|      | Watermelon mosaic virus (WMV)                   | [28] |
|      | Zucchini yellow mosaic virus (ZYMV)             | [32] |
| ZYMV | Beet yellows virus (BYV)                        | [4]  |
|      | Cucurbit aphid-borne yellows virus (CABYV)      | [6]  |
|      | Cucumber green mottle mosaic virus (CGMMV)      | [4]  |
|      | Cucurbit chlorotic yellow virus (CCYV)          | [6]  |
|      | Cucumber vein yellowing virus (CVYV)            | [2]  |
|      | Cucurbit yellow stunting disorder virus (CYSDV) | [33] |
|      | Cucumber mosaic virus (CMV)                     | [6]  |
|      | Papaya ringsplot virus (PRSV)                   | [26] |
|      | Squash mosaic virus (SqMV)                      | [25] |
|      | Melon necrotic spot virus (MNSV)                | [2]  |

## References list:

1. Moreno, A.B.; López-Moya, J.J. When Viruses Play Team Sports: Mixed Infections in Plants. *Phytopathology* **2020**, *110*, 29–48.
2. Kassem, M.A.; Sempere, R.N.; Juárez, M.; Aranda, M.A.; Truniger, V. Cucurbit aphid-borne yellows virus Is Prevalent in Field-Grown Cucurbit Crops of Southeastern Spain. *Plant Dis.* **2007**, *91*, 232–238.
3. Vidal, A.H.; Sanches, M.M.; Alves-Freitas, D.M.T.; Abreu, E.F.M.; Lacorte, C.; Pinheiro-Lima, B.; Rosa, R.C.C.; Jesus, O.N.; Campos, M.A.; Varsani, A.; et al. First World Report of Cucurbit Aphid-Borne Yellows Virus Infecting Passionfruit. *Plant Dis.* **2018**, *102*, 2665.
4. Bananej, K.; Vahdat, A. Identification, distribution and incidence of viruses in field-grown cucurbit crops of Iran. *Phytopathol. Mediterr.* **2008**, *47*, 247–257.
5. Minicka, J.; Zarzyńska-Nowak, A.; Budzyńska, D.; Borodynko-Filas, N.; Hasiów-Jaroszewska, B. High-throughput sequencing facilitates discovery of new plant viruses in Poland. *Plants* **2020**, *9*, 1–20.
6. Chan, Y.L.; Saidov, N.; Lee, L.M.; Kuo, F.H.; Shih, S.L.; Kenyon, L. Survey of Viruses Infecting Tomato, Cucumber and Mung Bean in Tajikistan. *Horticulturae* **2022**, *8*, 1–9.
7. Xiang, H.Y.; Shang, Q.X.; Han, C.G.; Li, D.W.; Yu, J.L. Complete sequence analysis reveals two distinct poleroviruses infecting cucurbits in China. *Arch. Virol.* **2008**, *153*, 1155–1160.
8. Rabadán, M.P.; Juárez, M.; Gómez, P. Long-term monitoring of aphid-transmitted viruses in melon and zucchini crops: genetic diversity and population structure of cucurbit aphid-borne yellows virus and watermelon mosaic virus. *Phytopathology*. **2023**.
9. Knierim, D.; Tsai, W.S.; Maiss, E.; Kenyon, L. Molecular diversity of poleroviruses infecting cucurbit crops in four countries reveals the presence of members of six distinct species. *Arch. Virol.* **2014**, *159*, 1459–1465.
10. Damayanti, T.A.; Rahmatilah, M.; Listihani; Hidayat, S.H.; Wiyono, S. Cucurbit aphid-borne yellows virus (CABYV) infecting melon and bitter gourd in Java, Indonesia. *IOP Conf. Ser. Earth Environ. Sci.* **2021**, *948*.
11. Nikolić, D.; Vučurović, A.; Stanković, I.; Radović, N.; Zečević, K.; Bulajić, A.; Krstić, B. Viruses affecting tomato crops in Serbia. *Eur. J. Plant Pathol.* **2018**, *152*, 225–235.
12. Kim Jeong-Soo; Lee Su-Heon; Choi Hong-Soo; Kim Mi Kyeong; Kwak Hae-Ryun; Kim Jung Sun; Nam Moon; Cho Jeom Deog; Cho In-Sook; Choi Gug-Seoun 2007-2011 Characteristics of Plant Virus Infections on Crop Samples Submitted from Agricultural Places. *Res. Plant Dis.* **18**, 277–289.
13. Kumari, A.; Kumar, S.; Chauhan, P.S.; Raj, S.K. Elimination of coexisting canna yellow mottle virus, bean yellow mosaic virus and cucumber mosaic virus from Canna generalis cv. black knight through in vitro chemotherapy of rhizome explants. *3 Biotech* **2022**, *12*, 1–10.
14. Arogundade, O.; Balogun, S.O.; Aliyu, T.H. Effects of cowpea mottle virus and cucumber mosaic virus on six soybean (*Glycine max* L.) cultivars. *Virol. J.* **2009**, *6*, 1–5.
15. Odedara, O.O.; Kumar, P.L. Incidence and diversity of viruses in cowpeas and weeds in the unmanaged farming systems of savanna zones in Nigeria. *Arch. Phytopathol. Plant Prot.* **2017**, *50*, 1–12.
16. González, L.E.; Peiró, R.; Rubio, L.; Galipienso, L. Persistent southern tomato virus (Stv) interacts with cucumber mosaic and/or pepino mosaic virus in mixed-infections modifying plant symptoms, viral titer and small rna accumulation. *Microorganisms* **2021**, *9*.
17. Murphy, J.F.; Bowen, K.L. Synergistic disease in pepper caused by the mixed infection of

- Cucumber mosaic virus and Pepper mottle virus. *Phytopathology* **2006**, *96*, 240–247.
18. Da Silva Barbosa, G.; De Araújo Lima, J.A.; De Queiróz, M.A.; De Cássia Souza Dias, R.; Lima, C.S. Identification and effects of mixed infection of potyvirus isolates with cucumber mosaic virus in cucurbits. *Rev. Caatinga* **2016**, *29*, 1028–1035.
  19. Arogundade, O.; Balogun, O.S.; Kareem, K.T. Occurrence and distribution of pepper vein mottle virus and cucumber mosaic virus in pepper in Ibadan, Nigeria. *Virol. J.* **2012**, *9*, 2–5.
  20. Herrera-Vásquez, J.A.; Alfaro-Fernández, A.; Córdoba-Sellés, M.C.; Cebrián, M.C.; Font, M.I.; Jordá, C. First Report of Tomato torrado virus Infecting Tomato in Single and Mixed Infections with Cucumber mosaic virus in Panama. *Plant Dis.* **2009**, *93*, 198.
  21. Takeshita, M.; Koizumi, E.; Noguchi, M.; Sueda, K.; Shimura, H.; Ishikawa, N.; Matsuura, H.; Ohshima, K.; Natsuaki, T.; Kuwata, S.; et al. Infection dynamics in viral spread and interference under the synergism between Cucumber mosaic virus and Turnip mosaic virus. *Mol. Plant-Microbe Interact.* **2012**, *25*, 18–27.
  22. Alabi, O.J.; Al Rwahnih, M.; Jifon, J.L.; Sétamou, M.; Brown, J.K.; Gregg, L.; Park, J.W. A mixed infection of Lettuce chlorosis virus, papaya ringspot virus, and tomato yellow leaf curl virus-IL detected in a Texas papaya orchard affected by a virus-like disease outbreak. *Plant Dis.* **2017**, *101*, 1094–1102.
  23. Noa-Carrazana, J.C.; González-de-León, D.; Ruiz-Castro, B.S.; Piñero, D.; Silva-Rosales, L. Distribution of Papaya ringspot virus and Papaya mosaic virus in Papaya Plants (*Carica papaya*) in Mexico. *Plant Dis.* **2006**, *90*, 1004–1011.
  24. Huo, P.; Shen, W.T.; Yan, P.; Tuo, D.C.; Li, X.Y.; Zhou, P. Simultaneous detection of papaya ringspot virus, papaya leaf distortion mosaic virus, and papaya mosaic virus by multiplex real-time reverse transcription PCR. *Acta Virol.* **2015**, *59*, 380–388.
  25. Ali, A.; Mohammad, O.; Khattab, A. Distribution of viruses infecting cucurbit crops and isolation of potential new virus-like sequences from weeds in Oklahoma. *Plant Dis.* **2012**, *96*, 243–248.
  26. Yeşil, S. Detection of Some Virus Diseases of Edible Seed Squash (*Cucurbita pepo* L.) in Nevşehir Province, Turkey. *Selcuk J. Agric. Food Sci.* **2020**, *34*, 49–56.
  27. Domingo-Calap, M.L.; Moreno, A.B.; Pendón, J.A.D.; Moreno, A.; Ferreres, A.; López-Moya, J.J. Assessing the impact on virus transmission and insect vector behavior of a viral mixed infection in melon. *Phytopathology* **2020**, *110*, 174–186.
  28. De Moya-Ruiz, C.; Rabadán, P.; Juárez, M.; Gómez, P. Assessment of the current status of potyviruses in watermelon and pumpkin crops in Spain: Epidemiological impact of cultivated plants and mixed infections. *Plants* **2021**, *10*, 1–14.
  29. Jossey, S.; Babadoost, M. Occurrence and distribution of pumpkin and squash viruses in Illinois. *Plant Dis.* **2008**, *92*, 61–68.
  30. Mumo, N.N.; Mamati, G.E.; Ateka, E.M.; Rimberia, F.K.; Asudi, G.O.; Boykin, L.M.; Machuka, E.M.; Njuguna, J.N.; Pelle, R.; Stomeo, F. Metagenomic Analysis of Plant Viruses Associated With Papaya Ringspot Disease in *Carica papaya* L. in Kenya. *Front. Microbiol.* **2020**, *11*.
  31. Read, D.A.; Muoma, J.; Thompson, G.D. Metaviromic analysis reveals coinfection of papaya in western Kenya with a unique strain of Moroccan watermelon mosaic virus and a novel member of the family Alphaflexiviridae. *Arch. Virol.* **2020**, *165*, 1231–1234.
  32. Roggero, P.; Gotta, P.; Stravato, V.M.; Dellavalle, G.; Ciuffo, M. Further spread of Moroccan watermelon mosaic potyvirus in Italy in 1998. *J. Plant Pathol.* **1999**, *81*.
  33. Gil-Salas, F.M.; Peters, J.; Boonham, N.; Cuadrado, I.M.; Janssen, D. Co-infection with Cucumber vein yellowing virus and Cucurbit yellow stunting disorder virus leading to synergism in cucumber. *Plant Pathol.* **2012**, *61*, 468–478.
